# Supplementary material for: EMID1: a multifunctional molecule identified in a murine model for the invasion- independent metastasis pathway
Source: Research Square preprint supplement (doi:10.21203/rs.3.rs-254839/v1), 2021-03-16
Supplement: Supplementary file 2 [file 265776fe7a1beb155fd28f72.xlsx]

## Sheet: Table S2 (2)
Supplementary Table 1.
Genes	NGR	TNGR	NG	TNG	Hyp	Hyp*	Annotations	Gene
69 genes	304	34208	69	245	2.20345e-84	1.96768e-81	GO:0000278: mitotic cell cycle (BP)	Cdc20, Cdc7, Cenpm, Cenpi, Prim1, Pmf1, Cenpp, Cdkn2d, Bub1, Kif23, Ercc6l, Cdc25b, Ccdc99, Aurkb, Mcm2, Ccne2, Plk1, Mcm6, Mad2l1, Casc5, Kif2c, Pole2, Cenpk, Pttg1, Ccnb1, Cenpl, Cdc6, Gins1, Mcm5, Nek2, Pole, Zwilch, Kif18a, Ccna2, Cdk2, Lig1, Plk4, Mcm10, Rfc5, Rrm2, Nuf2, Cenpe, Pcnt, Cenph, Mlf1ip, Pcna, Tyms, Ccnb2, Rpa1, Mcm4, Cenpa, Dhfr, Mcm7, Xpo1, Cdca8, Wee1, Nup37, Rfc2, Aurka, Birc…
54 genes	286	34208	54	245	7.02925e-61	3.13856e-58	GO:0051301: cell division (BP)	Cdc20, Cdc7, Cdca3, Pmf1, Bub1, Hells, Ncapg2, Cdca7, Ercc6l, Cdc25b, Ccdc99, Cdca2, Ccne2, Mad2l1, Casc5, Kif2c, Spag5, Ncapd2, Pttg1, Kif11, Ccnb1, Cdc6, Mcm5, Syce2, Nek2, Zwilch, Ccna2, Cdk2, Lig1, Mastl, Nuf2, Cenpe, Cenph, Nusap1, Ccnb2, Ncapd3, Terf1, Tpx2, Aspm, Cdca8, Wee1, Nup37, Ncapg, Aurka, Birc5, Smc2, Fbxo5, Bub1b, Sgol1, Nsl1, Smc4, Cep55, Cit, Cdca5
34 genes	95	34208	34	245	5.17875e-49	1.54154e-46	GO:0000087: M phase of mitotic cell cycle (BP)	Cdc20, Cenpm, Cenpi, Pmf1, Cenpp, Bub1, Kif23, Ercc6l, Cdc25b, Ccdc99, Aurkb, Plk1, Mad2l1, Casc5, Kif2c, Cenpk, Cenpl, Zwilch, Kif18a, Nuf2, Cenpe, Cenph, Mlf1ip, Cenpa, Xpo1, Cdca8, Nup37, Birc5, Fbxo5, Bub1b, Kif20a, Nup107, Sgol1, Nsl1
38 genes	152	34208	38	245	7.68293e-48	1.71521e-45	GO:0006260: DNA replication (BP)	Clspn, Cdc7, Prim1, Dtl, Chaf1b, Blm, Nasp, Tk1, Mcm2, Chaf1a, Mcm6, Pole2, Brca1, Cdc6, Gins1, Mcm5, Pole, Cdk2, Lig1, Mcm10, Rfc5, Dut, Rrm2, Chek1, Pcna, Tyms, Top2a, Rpa1, Mcm4, Polq, Mcm7, Rfc2, Rrm1, Rpa2, Rbm14, Mcm3, Chtf18, Pola1
31 genes	85	34208	31	245	4.78636e-45	8.54844e-43	GO:0000236: mitotic prometaphase (BP)	Cdc20, Cenpm, Cenpi, Pmf1, Cenpp, Bub1, Ercc6l, Ccdc99, Aurkb, Plk1, Mad2l1, Casc5, Kif2c, Cenpk, Ccnb1, Cenpl, Zwilch, Kif18a, Nuf2, Cenpe, Cenph, Mlf1ip, Cenpa, Xpo1, Cdca8, Nup37, Birc5, Bub1b, Nup107, Sgol1, Nsl1
37 genes	187	34208	37	245	1.87851e-42	2.79585e-40	GO:0007067: mitosis (BP)	Cdca3, Kif23, Hells, Ncapg2, Cdc25b, Cdca2, Plk1, Mad2l1, Kif2c, Spag5, Kif22, Ncapd2, Pttg1, Tubb2a, Kif11, Cdc6, Nek2, Ccna2, Cdk2, Pbk, Mastl, Nuf2, Ccnb2, Ncapd3, Terf1, Tpx2, Aspm, Wee1, Ncapg, Aurka, Birc5, Smc2, Bub1b, Kif15, Cep55, Cit, Cdca5
41 genes	285	34208	41	245	5.194e-41	6.62606e-39	GO:0006281: DNA repair (BP)	Brca2, Clspn, Fanca, Exo1, Chaf1b, Bard1, Blm, Rad51, Ung, Xrcc3, Chaf1a, Eme1, Fancd2, Kif22, Pole2, Pttg1, Brca1, Paxip1, Pole, Cdk2, Lig1, Rfc5, Chek1, Pcna, Tyms, Rad51c, Top2a, Rpa1, Polq, Usp1, Rad54l, Uhrf1, H2afx, Ube2t, Topbp1, Rfc2, Smc2, Rpa2, Rbm14, Smc4, Pola1
45 genes	435	34208	45	245	1.8614e-38	2.07779e-36	GO:0007049: cell cycle (BP)	Brca2, Esco2, Clspn, Cdc20, Racgap1, Cdca3, Chaf1b, Hells, Ncapg2, Aurkb, Mlf1, Cdca2, Nasp, Mcm2, Chaf1a, Suv39h2, Mki67, Fancd2, Spag5, Ncapd2, Gsg2, Kif11, Brca1, Syce2, Cdkn3, Cdk2, Chek1, Melk, Nusap1, Ncapd3, Terf1, Tpx2, Aspm, Uhrf1, H2afx, Ncapg, Aurka, Smc2, Bub1b, Dtymk, Chtf18, Smc4, Cep55, Cit, Cdca5
27 genes	145	34208	27	245	2.11879e-30	2.10231e-28	GO:0000082: G1/S transition of mitotic cell cycle (BP)	Cdc7, Prim1, Cdkn2d, Mcm2, Ccne2, Mcm6, Pole2, Ccnb1, Cdc6, Mcm5, Pole, Cdkn3, Cdk2, Mcm10, Rrm2, Pcna, Tyms, Rpa1, Mcm4, Dhfr, Mcm7, Wee1, Rpa2, Fbxo5, Mcm3, Pola1, Cdca5
23 genes	131	34208	23	245	2.0254e-25	1.80869e-23	GO:0000075: cell cycle checkpoint (BP)	Clspn, Cdc20, Cdc7, Mcm2, Ccne2, Mcm6, Mad2l1, Ccnb1, Cdc6, Mcm5, Cdk2, Mcm10, Rfc5, Chek1, Ccnb2, Rpa1, Mcm4, Mcm7, Wee1, Rfc2, Rpa2, Bub1b, Mcm3
15 genes	30	34208	15	245	6.11573e-25	4.96486e-23	GO:0006271: DNA strand elongation involved in DNA replication (BP)	Prim1, Mcm2, Mcm6, Gins1, Mcm5, Lig1, Rfc5, Pcna, Rpa1, Mcm4, Mcm7, Rfc2, Rpa2, Mcm3, Pola1
19 genes	86	34208	19	245	3.09551e-23	2.30358e-21	GO:0006310: DNA recombination (BP)	Brca2, Exo1, Blm, Rad51, Xrcc3, Eme1, Brca1, Paxip1, Lig1, Rad51c, Rpa1, Rad54l, H2afx, Hmgb3, Smc2, Rpa2, Rbm14, Smc4, Hmgb1
20 genes	112	34208	20	245	2.09058e-22	1.43607e-20	GO:0000084: S phase of mitotic cell cycle (BP)	Prim1, Mcm2, Mcm6, Pole2, Cdc6, Gins1, Mcm5, Pole, Cdk2, Lig1, Rfc5, Pcna, Rpa1, Mcm4, Mcm7, Wee1, Rfc2, Rpa2, Mcm3, Pola1
16 genes	78	34208	16	245	3.38836e-19	2.16129e-17	GO:0000216: M/G1 transition of mitotic cell cycle (BP)	Cdc7, Prim1, Mcm2, Mcm6, Pole2, Cdc6, Mcm5, Pole, Cdk2, Mcm10, Rpa1, Mcm4, Mcm7, Rpa2, Mcm3, Pola1
13 genes	50	34208	13	245	2.65659e-17	1.58156e-15	GO:0000723: telomere maintenance (BP)	Prim1, Blm, Tinf2, Pole2, Pole, Lig1, Rfc5, Pcna, Rpa1, Terf1, Rfc2, Rpa2, Pola1
10 genes	21	34208	10	245	9.71913e-17	5.1054e-15	GO:0006270: DNA-dependent DNA replication initiation (BP)	Prim1, Mcm2, Mcm6, Pole2, Mcm5, Pole, Mcm4, Mcm7, Mcm3, Pola1
10 genes	21	34208	10	245	9.71913e-17	5.1054e-15	GO:0032201: telomere maintenance via semi-conservative replication (BP)	Prim1, Pole2, Pole, Lig1, Rfc5, Pcna, Rpa1, Rfc2, Rpa2, Pola1
10 genes	22	34208	10	245	1.77071e-16	8.7847e-15	GO:0000722: telomere maintenance via recombination (BP)	Prim1, Pole2, Pole, Lig1, Rfc5, Pcna, Rpa1, Rfc2, Rpa2, Pola1
15 genes	115	34208	15	245	5.51912e-15	2.59398e-13	GO:0000086: G2/M transition of mitotic cell cycle (BP)	Cdc25b, Plk1, Ccnb1, Nek2, Ccna2, Cdk2, Mastl, Plk4, Chek1, Pcnt, Melk, Ccnb2, Terf1, Wee1, Birc5
12 genes	59	34208	12	245	1.1553e-14	5.15843e-13	GO:0007059: chromosome segregation (BP)	Pmf1, Casc5, Pttg1, Brca1, Nek2, Nuf2, Cenph, Top2a, Nup37, Birc5, Sgol1, Nsl1
21 genes	312	34208	21	245	1.41515e-14	6.01775e-13	GO:0008283: cell proliferation (BP)	Emp1, Bub1, Aurkb, Tacc3, Nasp, Plk1, Mki67, Kif2c, Tnfsf9, Stil, Melk, Pcna, Tpx2, Mcm7, Uhrf1, Bub1b, Kif15, Gng2, Dtymk, Traip, Pola1
14 genes	102	34208	14	245	2.18692e-14	8.8769e-13	GO:0006334: nucleosome assembly (BP)	Cenpi, Cenpp, Hist1h1b, Mcm2, Casc5, Hist2h2ac, Hmgb2, Cenpk, Asf1b, H2afv, Cenph, Mlf1ip, Cenpa, H2afx
8 genes	20	34208	8	245	7.22087e-13	2.80358e-11	GO:0006297: nucleotide-excision repair, DNA gap filling (BP)	Pole2, Pole, Lig1, Rfc5, Pcna, Rpa1, Rfc2, Rpa2
7 genes	13	34208	7	245	1.46751e-12	5.46037e-11	GO:0007076: mitotic chromosome condensation (BP)	Ncapd2, Nusap1, Ncapd3, Ncapg, Smc2, Smc4, Cdca5
9 genes	40	34208	9	245	9.64424e-12	3.44492e-10	GO:0000724: double-strand break repair via homologous recombination (BP)	Brca2, Blm, Rad51, Brca1, Lig1, Rpa1, Rad54l, H2afx, Rpa2
10 genes	59	34208	10	245	1.36464e-11	4.68703e-10	GO:0006302: double-strand break repair (BP)	Brca2, Brip1, Rad51, Brca1, Lig1, Rpa1, H2afx, Rpa2, Trip13, Cdca5
11 genes	90	34208	11	245	5.13591e-11	1.63799e-09	GO:0007018: microtubule-based movement (BP)	Racgap1, Kif23, Kif2c, Tubal3, Kif22, Tubb2a, Kif11, Kif18a, Cenpe, Kif15, Kif20a
10 genes	67	34208	10	245	5.12347e-11	1.69454e-09	GO:0006289: nucleotide-excision repair (BP)	Brca2, Pole2, Pole, Lig1, Rfc5, Pcna, Rpa1, Rfc2, Rpa2, Neil3
7 genes	20	34208	7	245	6.35218e-11	1.95603e-09	GO:0000083: regulation of transcription involved in G1/S phase of mitotic cell cycle (BP)	Cdc6, Rrm2, Pcna, Tyms, Dhfr, Fbxo5, Pola1
10 genes	70	34208	10	245	8.04336e-11	2.39424e-09	GO:0007126: meiosis (BP)	Exo1, Rad51, Mki67, Syce2, Nek2, Cdk2, Rpa1, Rad54l, H2afx, Trip13
7 genes	22	34208	7	245	1.38053e-10	3.97681e-09	GO:0034080: CenH3-containing nucleosome assembly at centromere (BP)	Cenpi, Cenpp, Casc5, Cenpk, Cenph, Mlf1ip, Cenpa
10 genes	80	34208	10	245	3.1359e-10	8.75112e-09	GO:0031145: anaphase-promoting complex-dependent proteasomal ubiquitin-dependent protein catabolic process (BP)	Cdc20, Aurkb, Plk1, Mad2l1, Pttg1, Ccnb1, Cdk2, Aurka, Fbxo5, Bub1b
8 genes	44	34208	8	245	8.76077e-10	2.37072e-08	GO:0006283: transcription-coupled nucleotide-excision repair (BP)	Pole2, Pole, Lig1, Rfc5, Pcna, Rpa1, Rfc2, Rpa2
5 genes	8	34208	5	245	9.95477e-10	2.61459e-08	GO:0006268: DNA unwinding involved in replication (BP)	Rad51, Mcm2, Mcm6, Mcm4, Mcm7
6 genes	17	34208	6	245	1.4707e-09	3.75239e-08	GO:0007051: spindle organization (BP)	Ttk, Spag5, Kif11, Pcnt, Aurka, Bub1b
7 genes	30	34208	7	245	1.56947e-09	3.89315e-08	GO:0007094: mitotic cell cycle spindle assembly checkpoint (BP)	Cdc20, Bub1, Ttk, Mad2l1, Cenpe, Terf1, Bub1b
11 genes	129	34208	11	245	2.57058e-09	6.20412e-08	GO:0006974: response to DNA damage stimulus (BP)	Dtl, Bard1, Blm, Xrcc3, Brca1, Mastl, Chek1, Top2a, Mcm7, H2afx, Topbp1
6 genes	19	34208	6	245	3.18577e-09	7.48656e-08	GO:0051276: chromosome organization (BP)	Brca2, Blm, Pttg1, Rpa1, Rad54l, Cdca8
8 genes	55	34208	8	245	5.6239e-09	1.28773e-07	GO:0000079: regulation of cyclin-dependent protein kinase activity (BP)	Cdkn2d, Blm, Ccne2, Ccnb1, Cdc6, Cdkn3, Ccna2, Ccnb2
5 genes	11	34208	5	245	8.06954e-09	1.80152e-07	GO:0007080: mitotic metaphase plate congression (BP)	Ccdc99, Ccnb1, Kif18a, Cenpe, Cdca5
6 genes	22	34208	6	245	8.60461e-09	1.87413e-07	GO:0031572: G2/M transition DNA damage checkpoint (BP)	Clspn, Dtl, Blm, Plk1, Brca1, Chek1
5 genes	13	34208	5	245	2.22176e-08	4.72387e-07	GO:0071777: positive regulation of cell cycle cytokinesis (BP)	Racgap1, Kif23, Cdc25b, Aurkb, Cdc6
6 genes	27	34208	6	245	3.31285e-08	6.87993e-07	GO:0006259: DNA metabolic process (BP)	Xrcc3, Mki67, Kpna2, Pttg1, Lig1, Topbp1
5 genes	15	34208	5	245	5.12372e-08	1.01677e-06	GO:0001556: oocyte maturation (BP)	Brca2, Cdc25b, Ccnb1, Fbxo5, Trip13
5 genes	15	34208	5	245	5.12372e-08	1.01677e-06	GO:0000070: mitotic sister chromatid segregation (BP)	Mad2l1, Nek2, Nusap1, Smc4, Cit
8 genes	77	34208	8	245	8.48751e-08	1.64768e-06	GO:0055086: nucleobase-containing small molecule metabolic process (BP)	Umps, Tk1, Nt5c1b, Dut, Rrm2, Tyms, Rrm1, Dtymk
7 genes	56	34208	7	245	1.52604e-07	2.89948e-06	GO:0000910: cytokinesis (BP)	Racgap1, Kif23, Aurkb, Plk1, Birc5, Kif20a, Cit
4 genes	9	34208	4	245	3.14517e-07	5.85133e-06	GO:0033205: cell cycle cytokinesis (BP)	Brca2, Racgap1, Kif23, Cit
7 genes	67	34208	7	245	5.352e-07	9.75375e-06	GO:0051726: regulation of cell cycle (BP)	Dtl, Fignl1, Tacc3, Rbl1, Plk1, Mastl, Wee1
5 genes	24	34208	5	245	6.87992e-07	1.22875e-05	GO:0045931: positive regulation of mitotic cell cycle (BP)	Brca2, Cdc25b, Ccnb1, Terf1, Birc5
7 genes	73	34208	7	245	9.66821e-07	1.69289e-05	GO:0048015: phosphatidylinositol-mediated signaling (BP)	Hmgb2, Spag5, Pcna, Tyms, Top2a, Aurka, Bub1b
7 genes	75	34208	7	245	1.16353e-06	1.99814e-05	GO:0051439: regulation of ubiquitin-protein ligase activity involved in mitotic cell cycle (BP)	Cdc20, Plk1, Mad2l1, Ccnb1, Cdk2, Fbxo5, Bub1b
15 genes	457	34208	15	245	1.27107e-06	2.14163e-05	GO:0007596: blood coagulation (BP)	Racgap1, Kif23, Kif2c, Kif22, Kif11, Kif18a, Cdk2, Myb, Cenpe, Rad51c, Fcer1g, Wee1, Kif15, Gng2, Lck
3 genes	4	34208	3	245	1.444e-06	2.34453e-05	GO:0051256: spindle midzone assembly involved in mitosis (BP)	Racgap1, Kif23, Aurkb
3 genes	4	34208	3	245	1.444e-06	2.34453e-05	GO:0007019: microtubule depolymerization (BP)	Stmn1, Kif2c, Kif18a
17 genes	594	34208	17	245	1.61476e-06	2.57497e-05	GO:0006915: apoptotic process (BP)	Clspn, Bub1, Lmnb1, Hmgb2, Aldoc, Brca1, Phlda2, Tnfsf9, Pcnt, Melk, Tpx2, Birc5, Bub1b, Lck, Egln3, Mef2c, Hmgb1
4 genes	14	34208	4	245	2.42913e-06	3.74003e-05	GO:0007093: mitotic cell cycle checkpoint (BP)	Bub1, Mad2l1, Zwilch, Bub1b
4 genes	14	34208	4	245	2.42913e-06	3.74003e-05	GO:0007091: mitotic metaphase/anaphase transition (BP)	Plk1, Fbxo5, Bub1b, Cit
3 genes	5	34208	3	245	3.59085e-06	5.34438e-05	GO:0000730: DNA recombinase assembly (BP)	Rad51, Rpa1, Rpa2
3 genes	5	34208	3	245	3.59085e-06	5.34438e-05	GO:0051983: regulation of chromosome segregation (BP)	Bub1, Aurkb, Kif2c
3 genes	6	34208	3	245	7.14361e-06	9.66552e-05	GO:0008608: attachment of spindle microtubules to kinetochore (BP)	Aurkb, Casc5, Sgol1
3 genes	6	34208	3	245	7.14361e-06	9.66552e-05	GO:0046134: pyrimidine nucleoside biosynthetic process (BP)	Umps, Dut, Tyms
3 genes	6	34208	3	245	7.14361e-06	9.66552e-05	GO:0051571: positive regulation of histone H3-K4 methylation (BP)	Brca1, Paxip1, Myb
3 genes	6	34208	3	245	7.14361e-06	9.66552e-05	GO:0000089: mitotic metaphase (BP)	Cenpe, Cdca8, Fbxo5
3 genes	6	34208	3	245	7.14361e-06	9.66552e-05	GO:0034501: protein localization to kinetochore (BP)	Ccdc99, Aurkb, Bub1b
3 genes	6	34208	3	245	7.14361e-06	9.66552e-05	GO:0051103: DNA ligation involved in DNA repair (BP)	Hmgb2, Lig1, Hmgb1
6 genes	65	34208	6	245	7.36427e-06	9.67102e-05	GO:0006139: nucleobase-containing compound metabolic process (BP)	Brip1, Tk1, Pole, Dut, Tyms, Pola1
4 genes	18	34208	4	245	7.26011e-06	9.67653e-05	GO:0006261: DNA-dependent DNA replication (BP)	Pole2, Top2a, Rpa1, Rpa2
3 genes	7	34208	3	245	1.2435e-05	0.000156401	GO:0051290: protein heterotetramerization (BP)	Aldoc, Rrm2, Rrm1
3 genes	7	34208	3	245	1.2435e-05	0.000156401	GO:0033261: regulation of S phase (BP)	Cdc7, Chek1, Slbp
3 genes	7	34208	3	245	1.2435e-05	0.000156401	GO:0085020: protein K6-linked ubiquitination (BP)	Bard1, Brca1, Ube2t
5 genes	44	34208	5	245	1.56409e-05	0.00019399	GO:0010212: response to ionizing radiation (BP)	Brca1, Paxip1, Rad54l, H2afx, Topbp1
7 genes	114	34208	7	245	1.90385e-05	0.000232896	GO:0007568: aging (BP)	Fos, Srebf2, Aurkb, Aldoc, Tyms, Top2a, Lck
3 genes	8	34208	3	245	1.97906e-05	0.000238825	GO:0033151: V(D)J recombination (BP)	Hmgb2, Lig1, Hmgb1
4 genes	24	34208	4	245	2.43733e-05	0.000290204	GO:0006206: pyrimidine base metabolic process (BP)	Umps, Tk1, Dut, Tyms
3 genes	9	34208	3	245	2.95287e-05	0.000342456	GO:0006333: chromatin assembly or disassembly (BP)	Suv39h2, Asf1b, Hirip3
3 genes	9	34208	3	245	2.95287e-05	0.000342456	GO:0006265: DNA topological change (BP)	Hmgb2, Top2a, Hmgb1
4 genes	26	34208	4	245	3.39076e-05	0.000388199	GO:0000077: DNA damage checkpoint (BP)	Clspn, Brip1, Chek1, H2afx
3 genes	10	34208	3	245	4.19605e-05	0.000462601	GO:0000085: G2 phase of mitotic cell cycle (BP)	Blm, Kpna2, Cdk2
3 genes	10	34208	3	245	4.19605e-05	0.000462601	GO:0033993: response to lipid (BP)	Srebf2, Brca1, Pcna
3 genes	10	34208	3	245	4.19605e-05	0.000462601	GO:0000731: DNA synthesis involved in DNA repair (BP)	Cdkn2d, Pole, Pola1
2 genes	2	34208	2	245	5.10873e-05	0.000530477	GO:0051987: positive regulation of attachment of spindle microtubules to kinetochore (BP)	Ccnb1, Cenpe
2 genes	2	34208	2	245	5.10873e-05	0.000530477	GO:0006288: base-excision repair, DNA ligation (BP)	Hmgb2, Hmgb1
2 genes	2	34208	2	245	5.10873e-05	0.000530477	GO:0006335: DNA replication-dependent nucleosome assembly (BP)	Chaf1b, Chaf1a
2 genes	2	34208	2	245	5.10873e-05	0.000530477	GO:0090007: regulation of mitotic anaphase (BP)	Plk1, Cdc6
2 genes	2	34208	2	245	5.10873e-05	0.000530477	GO:0046602: regulation of mitotic centrosome separation (BP)	Nek2, Chek1
12 genes	416	34208	12	245	5.22557e-05	0.000536372	GO:0000122: negative regulation of transcription from RNA polymerase II promoter (BP)	Dlx1, Aurkb, Rbl1, Plk1, Myb, Prdm16, Pcna, Zfp36, Xpo1, Hey1, Mef2c, Hmgb1
3 genes	11	34208	3	245	5.73902e-05	0.00058238	GO:0006275: regulation of DNA replication (BP)	Esco2, Cdk2, Pcna
10 genes	301	34208	10	245	6.95052e-05	0.000697395	GO:0042493: response to drug (BP)	Fos, Srebf2, Arg1, Ccnb1, Tyms, Top2a, Terf1, Rad54l, Xpo1, Lck
3 genes	12	34208	3	245	7.61153e-05	0.000755233	GO:0001833: inner cell mass cell proliferation (BP)	Brca2, Ncapg2, Gins1
3 genes	13	34208	3	245	9.84265e-05	0.000945106	GO:0007062: sister chromatid cohesion (BP)	Rad51c, Smc2, Smc4
3 genes	13	34208	3	245	9.84265e-05	0.000945106	GO:0000132: establishment of mitotic spindle orientation (BP)	Gpsm2, Ccdc99, Cenpa
4 genes	34	34208	4	245	0.000100558	0.000955304	GO:0006284: base-excision repair (BP)	Ung, Lig1, Pcna, Neil3
5 genes	64	34208	5	245	9.7739e-05	0.000959131	GO:0030097: hemopoiesis (BP)	Brca2, Tacc3, Melk, Rpa1, Lck
10 genes	317	34208	10	245	0.000106462	0.00100074	GO:0007283: spermatogenesis (BP)	Brca2, Racgap1, Srebf2, Bard1, Hmgb2, Pttg1, Asf1b, Ccnb1, Trip13, Cit
10 genes	328	34208	10	245	0.000140552	0.00130742	GO:0044419: interspecies interaction between organisms (BP)	Bub1, Ung, Rbl1, Kpna2, Mlf1ip, Itgb6, Cenpa, Xpo1, Lck, Pola1
11 genes	398	34208	11	245	0.00015538	0.001309	GO:0006468: protein phosphorylation (BP)	Bub1, Cdc25b, Plk1, Gsg2, Nek2, Cdk2, Pbk, Plk4, Aurka, Bub1b, Lck
3 genes	15	34208	3	245	0.000154936	0.00131769	GO:0030261: chromosome condensation (BP)	Ncapg2, Ncapd2, Smc4
3 genes	15	34208	3	245	0.000154936	0.00131769	GO:0009165: nucleotide biosynthetic process (BP)	Tk1, Tyms, Dhfr
2 genes	3	34208	2	245	0.000152536	0.00132247	GO:0019985: translesion synthesis (BP)	Dtl, Pcna
2 genes	3	34208	2	245	0.000152536	0.00132247	GO:0061351: neural precursor cell proliferation (BP)	Pcnt, Melk
2 genes	3	34208	2	245	0.000152536	0.00132247	GO:0071173: spindle assembly checkpoint (BP)	Bub1, Casc5
2 genes	3	34208	2	245	0.000152536	0.00132247	GO:0009263: deoxyribonucleotide biosynthetic process (BP)	Rrm2, Rrm1
2 genes	3	34208	2	245	0.000152536	0.00132247	GO:0071459: protein localization to chromosome, centromeric region (BP)	Gsg2, Cenpa
2 genes	3	34208	2	245	0.000152536	0.00132247	GO:0048478: replication fork protection (BP)	Brca2, Blm
2 genes	3	34208	2	245	0.000152536	0.00132247	GO:0007144: female meiosis I (BP)	Cdc25b, Trip13
3 genes	16	34208	3	245	0.000189683	0.00158305	GO:0007052: mitotic spindle organization (BP)	Stmn1, Ttk, Kif11
3 genes	17	34208	3	245	0.000229112	0.00189442	GO:0006298: mismatch repair (BP)	Exo1, Pms1, Pcna
3 genes	18	34208	3	245	0.000273483	0.00224055	GO:0015949: nucleobase-containing small molecule interconversion (BP)	Rrm2, Rrm1, Dtymk
2 genes	4	34208	2	245	0.000303628	0.00239947	GO:0031497: chromatin assembly (BP)	Chaf1b, Chaf1a
2 genes	4	34208	2	245	0.000303628	0.00239947	GO:0043009: chordate embryonic development (BP)	Brca2, Brca1
2 genes	4	34208	2	245	0.000303628	0.00239947	GO:0051574: positive regulation of histone H3-K9 methylation (BP)	Brca1, Myb
2 genes	4	34208	2	245	0.000303628	0.00239947	GO:0006269: DNA replication, synthesis of RNA primer (BP)	Prim1, Pola1
4 genes	49	34208	4	245	0.000422357	0.00330846	GO:0006921: cellular component disassembly involved in apoptosis (BP)	Clspn, Lmnb1, Hmgb2, Hmgb1
2 genes	5	34208	2	245	0.000503653	0.00387726	GO:0032211: negative regulation of telomere maintenance via telomerase (BP)	Tinf2, Terf1
2 genes	5	34208	2	245	0.000503653	0.00387726	GO:0051382: kinetochore assembly (BP)	Cenpe, Cenpa
24 genes	1609	34208	24	245	0.000593613	0.00453073	GO:0006355: regulation of transcription, DNA-dependent (BP)	Pmf1, Chaf1b, Fubp1, Hells, Cdca7, Chaf1a, Rbl1, Mybl2, Suv39h2, Pttg1, Asf1b, Ncoa7, Paxip1, Atad2, Myb, Mlf1ip, Top2a, Tle3, Terf1, Uhrf1, Hey1, Hmgn2, Rbm14, Mef2c
11 genes	468	34208	11	245	0.00061016	0.00461757	GO:0045893: positive regulation of transcription, DNA-dependent (BP)	Brca2, Fos, Blm, Hmgb2, Brca1, Ccna2, Cdk2, Myb, Slc25a10, Prdm16, Mef2c
2 genes	6	34208	2	245	0.000751908	0.00541495	GO:0007089: traversing start control point of mitotic cell cycle (BP)	Cdc6, Cdk2
2 genes	6	34208	2	245	0.000751908	0.00541495	GO:0007064: mitotic sister chromatid cohesion (BP)	Gsg2, Cdca5
2 genes	6	34208	2	245	0.000751908	0.00541495	GO:0006287: base-excision repair, gap-filling (BP)	Pole, Pcna
2 genes	6	34208	2	245	0.000751908	0.00541495	GO:0051988: regulation of attachment of spindle microtubules to kinetochore (BP)	Racgap1, Nek2
2 genes	6	34208	2	245	0.000751908	0.00541495	GO:0006312: mitotic recombination (BP)	Rad51, Top2a
3 genes	25	34208	3	245	0.000742833	0.00557437	GO:0045840: positive regulation of mitosis (BP)	Nusap1, Terf1, Aurka
5 genes	101	34208	5	245	0.000819399	0.00585378	GO:0042127: regulation of cell proliferation (BP)	Fanca, Cdca7, Brca1, Tnfsf9, Egln3
3 genes	26	34208	3	245	0.000835302	0.00592003	GO:0007131: reciprocal meiotic recombination (BP)	Rad51, Pms1, Trip13
2 genes	7	34208	2	245	0.0010477	0.00725266	GO:0000076: DNA replication checkpoint (BP)	Cdc6, Pola1
2 genes	7	34208	2	245	0.0010477	0.00725266	GO:0006266: DNA ligation (BP)	Lig1, Top2a
2 genes	7	34208	2	245	0.0010477	0.00725266	GO:0010569: regulation of double-strand break repair via homologous recombination (BP)	Chek1, Rpa2
4 genes	65	34208	4	245	0.00123421	0.00847806	GO:0051436: negative regulation of ubiquitin-protein ligase activity involved in mitotic cell cycle (BP)	Cdc20, Mad2l1, Fbxo5, Bub1b
5 genes	111	34208	5	245	0.00125146	0.00853095	GO:0006461: protein complex assembly (BP)	Fanca, Chaf1b, Ppih, Chaf1a, Ccnb1
8 genes	294	34208	8	245	0.00134641	0.00910865	GO:0006366: transcription from RNA polymerase II promoter (BP)	Fos, Pmf1, Fubp1, Pttg1, Dek, Slbp, Trip13, Mef2c
2 genes	8	34208	2	245	0.00139033	0.00933509	GO:0016446: somatic hypermutation of immunoglobulin genes (BP)	Exo1, Ung
7 genes	230	34208	7	245	0.00141706	0.00944354	GO:0006357: regulation of transcription from RNA polymerase II promoter (BP)	Brip1, Fos, Hmgb2, Brca1, Dek, Mef2c, Hmgb1
