# Supplementary material for: EMID1: a multifunctional molecule identified in a murine model for the invasion- independent metastasis pathway
Source: Research Square preprint supplement (doi:10.21203/rs.3.rs-254839/v1), 2021-03-16
Supplement: Supplementary file 3 [file 9afc5dfe77be3ddf98fb74f1.xlsx]

## Sheet: Sheet1
Supplementary Table 2.
		Anti-EMU1 (185)
Organs	Intensity	Cell type
esophagus	-
stomach cardia	++	fundic gland
stomach pylorus	-
intestine	-
liver	-
pancreas	++	islet
salivary gland	±
lung	-
heart	-
thymus	-
skin	-
mammary gland	-
uterine cervix	-
endometrium	±
ovary	-
placenta	-
testis	±
prostate	-
kidney	+	tubules
urinary bladder	-
thyroid	-
adrenal	-
spleen	-
Lymph node	-
skeletal muscle	-
frontal lobe	-
celebellum	-
Supplementary Table 3.
	Anti-EMU1 (185)
Types of cancer	EMID1 positivity
Breast carcinoma	10/20 (50%)
Renal cell carcinoma	6/16 (38%)
Gastric carcinoma	0/ 7 (0%)
Colon carcinoma	2/10 (20%)
Hepatocellular carcinoma	2/ 9 (22%)
Lung carcinoma	8/42 (19%)
Adenocarcinoma	3/23 (13%)
Squamous cell carcinoma	5/19 (26%)
