# Supplementary material for: EMID1: a multifunctional molecule identified in a murine model for the invasion- independent metastasis pathway
Source: Research Square preprint supplement (doi:10.21203/rs.3.rs-254839/v1), 2021-03-16
Supplement: Supplementary file 4 [file 25810aa3efc934905d81ad8c.xlsx]

## Sheet: Table S1
Supplementary Table 4.
PCR primer		The sequences are 5′- to 3′-.
Emid1	Sense	CCTTCTGGACCCAAAGGAACCTCT
	Anti-sense	CTCCCGGAACCCCCATCAAA
B-actin	Sense	CAGCTTCTTTGCAGCTCCTTC
	Anti-sense	TGACCCATTCCCACCATCAC
siRNA
	siE1	CAAUGAUUGGGCUCUAUGAtt
	siE2	AGACCCUUGUACAAAGUGAtt
	siE3	AGAGGGUUUUAAUCUUGGAtt
	Negative control	AGAGGGUUUAAUCUUGGAtt
